# Supplementary material
Source: Springer Nature journal article supplement (https://www.springermedizin.de/resource/supplementary/13058_2005_1340_MOESM5_ESM.pdf/9698894)

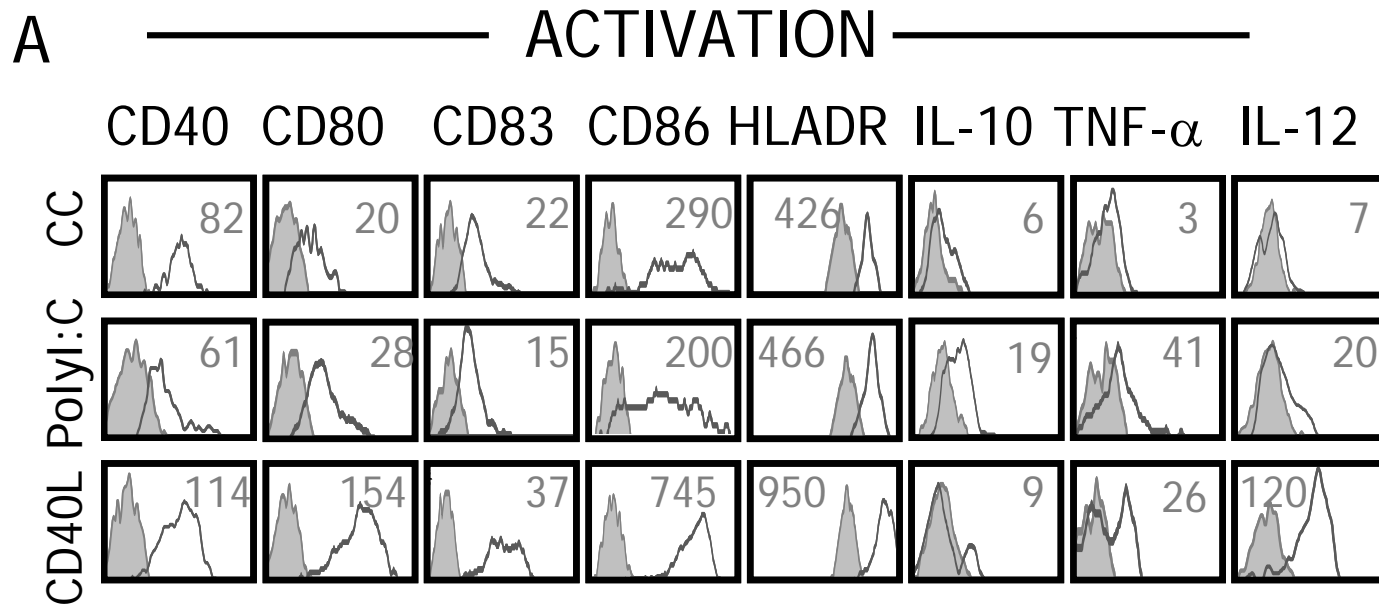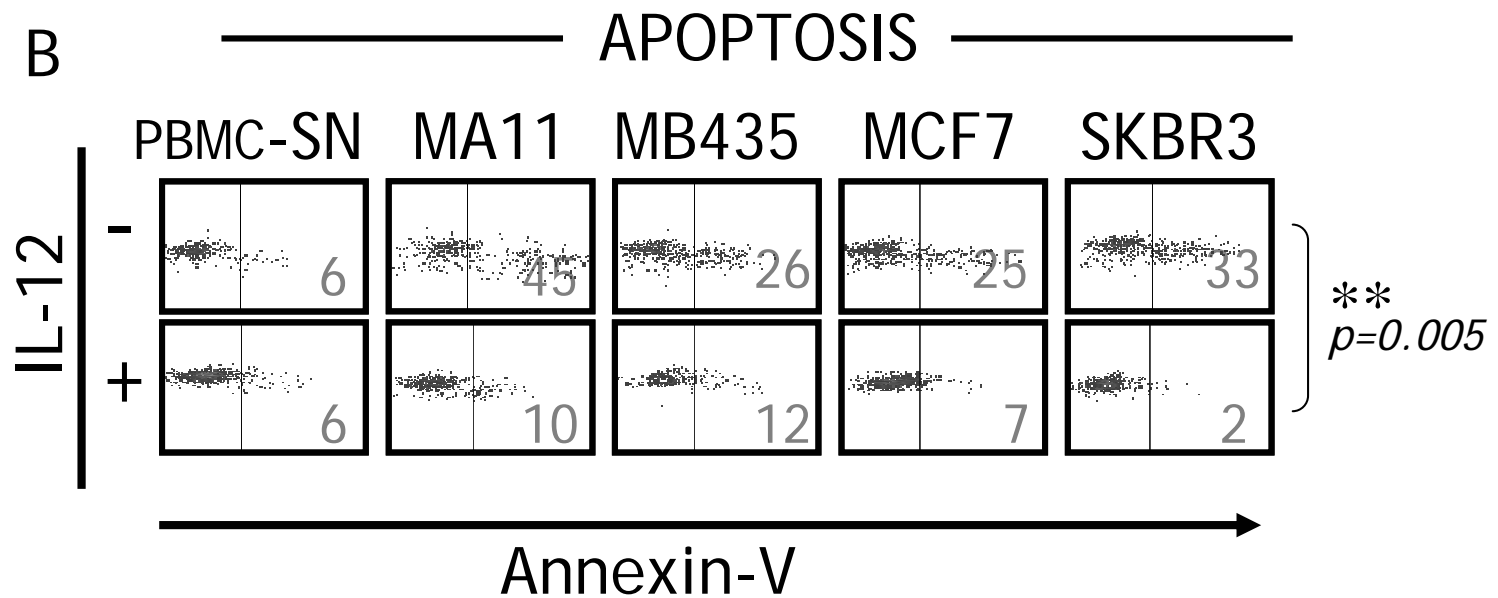

Supplement: MOESM5 [file 9698894]
